# Supplementary material for: Hemophilia A Inhibitor Subjects Show Unique PBMC Gene Expression Profiles That Include Up-Regulated Innate Immune Modulators
Source: Front Immunol. 2020 Jun 12;11:1219. doi: 10.3389/fimmu.2020.01219 (PMC7303277; doi:10.3389/fimmu.2020.01219)
Supplement: Supplementary file 1 [file Table_1.xlsx]

## Sheet: Table S1
Supplemental Table S1. RNA samples submitted for initial RNASeq analysis
	Subject #	Blood Sample #	Unstimulated	t = 4 hrs	t = 16 hrs	t = 24 hrs	t = 48 hrs
1	A1	A1-1	ü	ü	ü	ü	ü
2	A2	A2-1	ü	ü	ü	ü	ü
3	A3	A3-1	ü	ü	ü	ü	ü
4	A4	A4-1	ü	ü	ü	ü	ü
5	A5	A5-1	ü	ü	ü	ü	ü
6	A6	A6-1	ü	ü	ü	ü	ü
7	A7	A7-1	ü	ü	ü	ü	ü
8	A8	A8-1	ü	ü	ü	ü	ü
9	A9	A9-1	ü	ü	ü	ü	ü
10	A10	A10-1	ü	ü	ü	ü	ü
11	A11	A11-1	ü	ü	ü	ü	ü
12	B1	B1-1	ü	ü	ü	ü	ü
13	B2	B2-1	ü	ü	ü	ü	ü
14	B3	B3-1	ü	ü	ü	ü	ü
15	B4	B4-1-R1	ü	ü	ü	ü	ü
16	B5	B5-1	ü	ü	ü	ü	ü
17	B6	B6-1	ü	ü	ü	ü	ü
18	B7	B7-1	ü	ü	ü	ü	ü
19	B8	B8-1	ü	ü	ü	ü	ü
20	C1	C1-1	ü	ü	ü	ü	ü
21	C2	C2-1	ü	ü	ü	ü	ü
22	C3	C3-1	ü	ü	ü	ü	ü
23	C4	C4-1	ü	ü	ü	ü	ü
24	C5	C5-1	ü	ü	ü	ü	ü
25	C6	C6-1	ü	ü	ü	ü	ü
26	C7	C7-1	ü	ü	ü	ü	ü
27	C8	C8-1	ü	ü	ü	ü	ü
28	C9	C9-1	ü	ü	ü	ü	ü
29	C10	C10-1	ü	ü	ü	ü	ü
30	C11	C11-1-R1	ü	ü	ü	ü	ü
31	C12	C12-1	ü	ü	ü	ü	ü
32	C13	C13-1	ü	ü	ü	ü	ü
33	D1	D1	ü	ü	ü	ü	ü
34	D2	D2	ü	ü	ü	ü	N/A
35	D3	D3-1-R1	ü	ü	ü	ü	N/A
36	D4	D4-1	ü	ü	ü	ü	ü
37	D5	D5-1	ü	ü	ü	ü	ü
38	D6	D6	ü	ü	ü	ü	ü
39	D7	D7-1-R1	ü	ü	ü	ü	ü
40	D8	D8-1	ü	ü	ü	ü	ü
Group A: HA with a past inhibitor (currently tolerant to FVIII)
Group B: HA with a current inhibitor, 4 undergoing Immune Tolerance Induction therapy (ITI).
Group C: HA with no inhibitor history.
Group D: Non-HA healthy control subjects.
R1 = Replicate 1.
N/A: RNA yield or integrity were insufficient to analyze the following samples:
D2(48hrs), D3-1-R1(48hrs).
üAll other samples had RNase Integrity Numbers (RIN) > 7.
