# Supplementary material for: Hemophilia A Inhibitor Subjects Show Unique PBMC Gene Expression Profiles That Include Up-Regulated Innate Immune Modulators
Source: Front Immunol. 2020 Jun 12;11:1219. doi: 10.3389/fimmu.2020.01219 (PMC7303277; doi:10.3389/fimmu.2020.01219)
Supplement: Supplementary file 2 [file Table_2.xlsx]

## Sheet: Table S2
Supplemental Table 2. Multiplex cytokine screening results
Analytes	INH (past) Group A		INH (current) Group B		INH (no history) Group C		non-HA Group D
	Unstim	48h	Unstim	48h	Unstim	48h	Unstim	48h	sensitivity (pg/ml)	standard curve range (pg/ml)
Eotaxin	0.35±0.22	0.58±0.42	0.24±0.20	0.38±0.47	<0.5	<0.5	1.21±0.46	1.02±0.71	0.5	0.7 - 1370
GMCSF	2.46±0.91	3.05±0.96	31.91±12.13	37.31±15.26	107±63	141±60	54.72±3.8	59.58±3.7	0.5	0.87 - 5100
IFN-a	<5	<5	<5	<5	<5	<5	15.54	13.57	5	4.5 - 9000
IFN-g	<0.5	<0.5	<0.5	<0.5	7.93	12.89	2.91	4.55	0.5	0.35 - 2970
IL1b	11.73±0.80	15.8±0.82	74.22±10	102±22	240±109	298±102	1073±302	1261±431	5	4.4 - 8600
IL1Ra	1361±410	1597±472	2607±355	2386±308	4088±874	2614±760	3223±171	3328±250	0.5	2.13 - 41890
IL10	6.5±3.5	11±8.0	9.37±5.1	16.05±10	50.30±37	63.26±41.0	242±25	248±29	0.5	0.5 - 9775
IL12	16.35±3.2	16.43±3.9	16.38±4.5	18.91±6.9	41.66±24	53.16±18	30.12±10	31.32±12	1	0.95 - 6400
IL13	<1	<1	<1	<1	<1	<1	<1	<1	1	1.5 - 9450
IL15	4.22±.75	3.13±1.2	3.31±1.3	4.49±1.56	7.62±3.12	9.8±1.9	23.54±0.88	23.89±0.94	5	2.47 - 16865
IL17A	<1	<1	<1	<1	<1	<1	1.55	2.49	1	0.96 - 18895
IL2	12.56±4.75	14.02±5.2	<1	<1	<1	<1	1.51	4.37	1	1.8 - 10400
IL2r	35.9±2.7	34.33±2.73	23.92±4.14	23.34±4.47	36.38±10	43.67±11	69.99±14.75	75.18±13.75	10	5 - 41875
IL4	<5	<5	<5	<5	8.31±2.1	8.99±2.7	10.8±1.05	13.06±1.41	5	2.09 - 41075
IL5	<0.5	<0.5	<0.5	<0.5	<0.5	<0.5	<0.5	<0.5	0.5	0.4 - 7920
IL6	>7500	>7500	117±54	133±74	>7500	>7500	>7500	>7500	0.5	0.4 - 7500
IL7	34.36±6.73	26.66±8.73	<5	<5	39.74±1.73	39.49±0.73	42.27±0.73	42.43±2.74	5	5.5 - 12585
IL8	>5905	>5905	>5905	>5905	>5905	>5905	>5905	>5905	1	0.9 - 5905
IP10	1.21±0.63	2.48±1.63	<0.5	<0.5	0.48±0.27	1.676±1.15	4.69±1.63	5.84±2.29	0.5	0.2 - 380
MCP1	>18650	>18650	>18650	>18650	>18650	>18650	>18650	>18650	5	5 - 18650
MIG	41.7±10.0	44.5±8.5	35.38±17.5	43.11±19.2	31.61±8.5	52.3±9.5	60±33.1	60.3±37.1	5	1.96 - 19195
MIP1a	109±35	116±42	11363±6220	12100±7049	15480±5500	21836±8390	21758±1061	20884±1135	5	4.66 - 13815
MIP1b	326±125	312±122	4043±830	4381±968	7607±3383	9343±3568	16970±3805	15968±4007	5	8 - 17455
RANTES	64±17	63±18	199±41	169±46	387±80	497±90	838±137	811±193	5	3.44 - 8650
TNFa	3.08±1.2	1.96±1.2	122±41.2	304±139	44.72±15	32.90±9	66.13±2.3	25.76±3.95	0.5	0.48 - 3615
