# Supplementary material for: Hemophilia A Inhibitor Subjects Show Unique PBMC Gene Expression Profiles That Include Up-Regulated Innate Immune Modulators
Source: Front Immunol. 2020 Jun 12;11:1219. doi: 10.3389/fimmu.2020.01219 (PMC7303277; doi:10.3389/fimmu.2020.01219)
Supplement: Supplementary file 3 [file Table_3.xlsx]

## Sheet: 3A  DEGs HA past inhibitor
Supplemental Table 3. Fold Change values for DEGs
Gene	l2fc_4hr	l2fc_16hr	l2fc_24hr	l2fc_48hr	LRT_fdr
H1F0	-0.24	0.373	-0.007	0.141	2.03e-05
PMEPA1	0.45	0.031	0.064	-0.038	2.17e-05
CLIC3	0.577	0.202	0.168	0.273	0.000702
ROM1	0.44	0.014	-0.021	-0.039	0.000801
SMPD3	-0.119	0.053	0.15	0.375	0.00177
FBLN7	0.434	0.013	0.168	0.099	0.00462
OCIAD2	0.406	0.007	0.115	-0.012	0.00736
DKK3	0.475	0.121	0.139	0.349	0.0193
SLC16A6	-0.105	0.115	-0.163	-0.331	0.025
TMIGD2	0.452	0.158	0.23	0.285	0.025
NCRNA00107	0.062	0.415	0.223	0.062	0.0304
UPF3B	-0.072	-0.327	-0.102	-0.069	0.0306
DDIT4	0.031	0.441	0.104	0.012	0.0398
ITM2C	0.369	0.127	0.174	0.249	0.0402
CSF2RA	-0.014	-0.097	-0.238	-0.367	0.0462

## Sheet: 3B DEGs HA current inhibitor
Gene	l2fc_4hr	l2fc_16hr	l2fc_24hr	l2fc_48hr	LRT_fdr
NLRP3	-0.066	0.588	0.396	0.232	2.44e-07
PSMB9	0.025	0.224	0.213	0.424	1.67e-05
LILRA5	-0.055	0.365	0.301	0.512	1.92e-05
PSMB8	0.002	0.208	0.263	0.331	8.88e-05
IL32	0.062	0.346	0.161	0.562	0.000208
MYCL	-0.146	0.52	0.162	0.39	0.000208
BATF	0.014	0.3	0.295	0.385	0.000806
CD1D	-0.028	0.505	0.276	0.459	0.00105
CLEC10A	0.008	0.602	0.463	0.484	0.00119
C10orf128	0.047	0.23	0.519	0.534	0.00124
FPR1	0.008	0.564	0.428	0.174	0.00124
SLC46A1	-0.014	0.545	0.487	0.301	0.00194
SLC4A10	-0.007	0.06	0.132	0.55	0.00194
TLR8	-0.063	0.539	0.313	0.393	0.00194
PLD4	0.237	0.634	0.399	0.525	0.00209
MEI1	0.033	0.342	0.414	0.282	0.00211
ARRDC3	0.06	-0.053	-0.164	-0.381	0.00539
FCN1	-0.022	0.516	0.279	0.482	0.00539
KIAA1522	0.085	-0.368	-0.323	-0.124	0.00539
IGLC3	0.055	0.337	0.316	0.593	0.00558
ASGR1	0.033	0.546	0.388	0.377	0.0073
CD160	-0.032	0.481	0.44	0.312	0.0073
CPED1	-0.035	0.509	0.297	0.43	0.0073
PMEPA1	0.468	0.193	0.004	0.021	0.0073
CTD-2335A18.1	-0.112	0.286	0.334	0.349	0.00732
HNMT	-0.015	0.454	0.292	0.299	0.00741
KIF27	-0.067	-0.261	-0.54	-0.514	0.00741
COLEC12	0.09	0.167	0.321	0.62	0.00906
KANK1	0.033	-0.236	-0.272	-0.441	0.00906
TTC23	-0.025	0.028	0.332	0.415	0.00914
SPINT2	0.08	0.396	0.36	0.315	0.0103
ZEB1	-0.08	-0.161	-0.338	-0.333	0.0127
HOPX	-0.008	0.373	0.472	0.325	0.0162
UQCC2	0.011	0.164	0.364	0.326	0.0176
NKG7	0.004	0.4	0.488	0.355	0.0213
RP11-213G21.1	-0.111	-0.281	-0.416	-0.538	0.0213
LRRC25	-0.018	0.401	0.325	0.224	0.0232
GPSM1	0.027	-0.268	-0.223	-0.342	0.0238
CTD-2020K17.3	-0.267	-0.441	-0.516	-0.587	0.0239
TRIM33	-0.029	-0.294	-0.341	-0.256	0.0252
LARGE	0.197	0.237	0.021	0.403	0.0303
PMP22	-0.108	0.313	0.345	0.296	0.0303
RP11-791G16.4	-0.167	-0.43	-0.518	-0.288	0.0324
LILRA1	-0.026	0.424	0.254	0.434	0.0374
GZMA	-0.081	0.329	0.441	0.255	0.0376
C1RL	-0.092	0.075	0.001	0.365	0.0411
LILRA2	-0.088	0.133	0.118	0.346	0.0412
S100A4	0.01	0.29	0.448	0.326	0.0429
GNLY	-0.048	0.348	0.285	0.467	0.0456
AC007256.5	0.078	-0.194	-0.442	-0.109	0.0462
RP11-11N9.4	0.065	0.249	0.282	0.466	0.0462
FCER2	-0.031	0.08	0.063	0.487	0.0465
MT-ATP8	0.007	-0.147	-0.477	-0.279	0.0465
GIMAP6	0.144	0.35	0.29	0.233	0.0471
FASLG	0.012	0.479	0.402	0.238	0.0473
P2RY6	0.025	0.443	0.452	0.345	0.0473

## Sheet: 3C DEGs HA no inhibitor history
Gene	l2fc_4hr	l2fc_16hr	l2fc_24hr	l2fc_48hr	LRT_fdr
GCLM	0.093	-0.402	-0.365	-0.478	3.24e-23
OSGIN1	0.055	-0.349	-0.378	-0.49	5.92e-17
TXNRD1	0.056	-0.391	-0.317	-0.469	5.99e-16
RAB37	-0.056	0.276	0.291	0.373	7.55e-16
GCLC	-0.008	-0.315	-0.26	-0.358	2.85e-13
ALOX5	-0.101	0.176	0.225	0.429	6.35e-13
ANXA1	0.069	-0.342	-0.233	-0.303	2.63e-12
PTGR1	-0.047	-0.316	-0.293	-0.513	4.36e-12
AKR1C1	0.11	-0.379	-0.351	-0.58	6.66e-12
TRIM16	0.173	-0.317	-0.208	-0.341	8.24e-12
ME1	-0.002	-0.335	-0.323	-0.432	2.51e-11
TRIM16L	0.054	-0.404	-0.304	-0.511	4.93e-11
NQO1	-0.067	-0.253	-0.266	-0.472	2.51e-10
ST3GAL4	0.09	-0.298	-0.216	-0.336	7.37e-10
GSR	-0.059	-0.319	-0.24	-0.362	1.76e-09
UCHL1	-0.013	-0.332	-0.402	-0.553	2.17e-09
ST3GAL6	-0.075	-0.355	-0.136	-0.138	5.12e-09
CTB-58E17.1	-0.011	-0.339	-0.353	-0.393	5.81e-09
SRXN1	0.034	-0.339	-0.307	-0.475	5.92e-09
CD93	-0.021	0.519	0.306	0.321	9.48e-09
AKR1C2	0.127	-0.353	-0.265	-0.478	1.98e-08
H1F0	-0.172	0.382	0.216	0.198	3.11e-08
CTNNAL1	0.183	-0.271	-0.22	-0.338	3.12e-08
RP11-622O11.2	0.127	0.489	0.216	0.381	3.38e-08
TBC1D7	0.072	-0.404	-0.203	-0.306	4.2e-08
GTF2IRD1	-0.007	-0.454	-0.195	-0.147	5.05e-08
OLFML2B	-0.248	0.094	0.096	0.353	6.55e-08
AKR1C3	0.032	-0.341	-0.302	-0.491	7.29e-08
C11orf21	-0.043	0.303	0.201	0.389	7.93e-08
CR1	-0.095	0.459	0.182	0.406	7.95e-08
SLC22A16	-0.21	0.154	0.143	0.425	8.97e-08
RP11-813I20.3	-0.049	-0.436	-0.321	-0.488	1.08e-07
RP11-465B22.3	0.197	-0.242	-0.105	-0.352	1.2e-07
ASPH	-0.051	-0.363	-0.356	-0.403	1.25e-07
AOAH	-0.072	0.391	0.186	0.312	1.45e-07
MGST1	0.062	-0.21	-0.203	-0.441	1.66e-07
CD1D	-0.157	0.406	0.271	0.311	1.82e-07
SH3BP5	0.002	-0.336	-0.198	-0.284	2.01e-07
SLC8A1	-0.162	0.33	0.111	0.305	2.54e-07
PMEPA1	0.469	-0.049	-0.02	0	3.13e-07
NLRP3	-0.066	0.433	0.234	0.124	5.18e-07
CIR1	0.005	-0.33	-0.239	-0.28	5.73e-07
RGCC	0.024	-0.342	-0.225	-0.294	6.07e-07
NCS1	0.051	-0.422	-0.257	-0.276	8.73e-07
LZTS3	0.468	0.01	0.124	0.138	9.91e-07
MREG	-0.001	-0.368	-0.154	-0.12	1.16e-06
SLC12A8	0.029	-0.411	-0.317	-0.383	1.37e-06
FBLN7	0.448	-0.001	0.005	0.035	1.47e-06
RP11-443P15.2	0	-0.343	-0.236	-0.412	1.59e-06
ITGAL	0.097	0.325	0.203	0.283	1.65e-06
DCSTAMP	0.087	-0.34	-0.316	-0.322	2.32e-06
HMGB2	-0.134	-0.125	-0.073	-0.371	2.91e-06
SLC46A1	-0.156	0.353	0.195	0.342	3.08e-06
CRISPLD2	0.079	0.469	0.442	0.332	4e-06
ADGRG5	0.225	0.326	0.254	0.397	4.14e-06
TSKU	-0.123	-0.496	-0.317	-0.442	4.48e-06
DPYSL3	0.135	-0.266	-0.273	-0.403	4.52e-06
RP11-202P11.1	-0.009	-0.408	-0.218	-0.164	4.52e-06
CSF2RA	0.037	-0.235	-0.177	-0.335	5.47e-06
PIR	-0.054	-0.219	-0.289	-0.343	5.66e-06
TMEM158	-0.046	-0.364	-0.342	-0.473	5.67e-06
RP11-400N13.3	0.062	-0.381	-0.357	-0.337	6.21e-06
TXN	0.041	-0.286	-0.207	-0.381	7.82e-06
DNAJB4	-0.025	-0.225	-0.232	-0.339	9.7e-06
TNFRSF12A	0.062	-0.303	-0.331	-0.229	1.34e-05
CACNA1I	0.024	0.343	0.161	0.309	1.72e-05
GPAT3	-0.091	-0.383	-0.348	-0.416	1.84e-05
GSTM3	-0.089	-0.203	-0.135	-0.331	2.56e-05
HMOX1	-0.049	-0.283	-0.377	-0.412	2.84e-05
VENTX	0.008	0.326	0.209	0.431	3.48e-05
SLC7A11	0.11	-0.326	-0.213	-0.285	3.95e-05
ZNF442	-0.06	-0.037	-0.085	-0.389	4.21e-05
BRCA2	0.019	-0.229	-0.261	-0.348	4.57e-05
PADI2	0.066	0.507	0.144	0.164	4.82e-05
MAP7	-0.066	-0.359	-0.232	-0.367	5.24e-05
MIR22HG	0.083	-0.328	-0.098	-0.133	5.38e-05
ZNF831	0.032	0.323	0.147	0.214	6.29e-05
FCGR2C	-0.03	0.21	0.265	0.449	6.29e-05
MT1X	-0.392	-0.334	-0.381	-0.455	6.36e-05
ST8SIA4	-0.048	0.362	0.154	0.182	6.62e-05
SLC9A9	-0.058	0.368	0.189	0.228	0.000103
NR1H3	0.036	-0.34	-0.148	-0.143	0.000113
RP11-259P6.2	0.031	0.385	0.133	0.337	0.000113
PHLDA3	0.12	-0.375	-0.218	-0.218	0.000117
DYSF	-0.03	0.368	0.191	0.345	0.000128
LRP1	-0.014	0.367	0.132	0.325	0.000157
RP11-382H24.3	-0.041	-0.363	-0.145	-0.285	0.000164
GPR109B	0.346	-0.02	0.02	-0.07	0.000185
GAPDHP14	-0.127	-0.41	-0.345	-0.405	0.000193
SPINK1	0.105	-0.257	-0.209	-0.36	0.000218
MAST4	0.116	0.391	0.178	0.268	0.00023
LILRA5	-0.104	0.226	0.223	0.351	0.000268
AC025171.1	0.037	0.418	0.209	0.29	0.000295
SLC48A1	-0.045	-0.167	-0.29	-0.325	0.00031
CLEC10A	-0.034	0.29	0.314	0.328	0.000312
NOD2	-0.051	0.328	0.227	0.226	0.000331
EREG	0.326	0.048	0.006	-0.18	0.000355
CR2	0.048	0.338	0.123	0.257	0.000363
CMKLR1	-0.089	0.324	0.172	0.305	0.000372
TSPAN15	-0.084	0.166	0.188	0.363	0.000375
RP11-213H15.3	0.04	-0.199	-0.199	-0.373	0.000458
PDGFB	0.474	0.291	0.249	0.253	0.000471
FLT4	0.235	0.37	0.263	0.23	0.000476
RP11-548C21.1	-0.017	-0.219	0.03	-0.396	0.000481
BMP6	0.112	-0.168	-0.172	-0.347	0.000481
CLIC3	0.503	0.22	0.231	0.174	0.000488
RP11-436M15.4	-0.231	-0.235	-0.122	-0.34	0.000601
ITGA1	0.348	0.326	0.095	0.17	0.000604
RP11-157D23.2	0.111	-0.249	-0.118	-0.326	0.000631
KIAA1671	0.419	0.179	0.148	0.152	0.000762
TRBJ1-5	0.109	0.365	0.148	0.406	0.000793
FAM109B	0.024	0.138	0.137	0.362	0.000796
TM4SF19	0.013	-0.363	-0.262	-0.19	0.000804
GDF15	-0.016	-0.383	-0.18	-0.242	0.000811
PRF1	0.057	0.348	0.171	0.246	0.00111
PTGFRN	-0.082	0.36	0.179	0.175	0.00111
TRPS1	-0.03	0.333	0.149	0.248	0.00111
CNR1	0.331	-0.038	-0.028	0.097	0.00123
FAM20A	-0.033	0.234	0.144	0.357	0.00143
TMPRSS13	0.046	0.297	0.34	0.266	0.00145
TIFAB	0.018	0.29	0.27	0.364	0.00151
SORL1	0.081	0.366	0.164	0.258	0.00157
CCNA1	0.088	-0.341	-0.206	-0.168	0.00169
RP11-123J14.2	0.048	-0.223	-0.162	-0.333	0.00183
TLR8	-0.038	0.338	0.222	0.257	0.00185
OAS3	-0.026	0.268	0.241	0.343	0.00214
MAML3	-0.02	0.359	0.123	0.134	0.00219
THBD	0.122	0.429	0.224	0.198	0.00221
CCR2	0.048	0.223	0.145	0.371	0.00223
NLRC3	0.343	0.059	0.074	0.128	0.00229
MX1	-0.029	0.27	0.273	0.327	0.00244
ROM1	0.326	-0.072	-0.05	-0.037	0.0026
AK8	-0.008	-0.251	-0.224	-0.373	0.00292
ZNF433	-0.116	-0.031	-0.077	-0.344	0.00292
CTTN	0.019	-0.364	-0.18	-0.273	0.00303
SLC26A11	-0.048	-0.338	-0.129	-0.05	0.0032
CARF	0.074	0.358	0.131	0.234	0.00332
RP11-513I15.3	-0.171	-0.387	-0.194	-0.28	0.00332
CDKN3	0.054	-0.241	-0.135	-0.323	0.00339
ATP2B4	0.121	0.342	0.101	0.257	0.00365
PLD4	0.144	0.375	0.241	0.359	0.00377
THBS1	0.041	0.342	0.12	0.167	0.00377
MT1E	-0.265	-0.313	-0.342	-0.381	0.004
RP11-680A11.5	-0.082	-0.251	-0.3	-0.359	0.00411
C14orf64	0.078	0.325	0.196	0.27	0.00422
PPIC	-0.033	-0.298	-0.331	-0.272	0.00466
CPED1	0.122	0.391	0.343	0.274	0.00486
XAF1	0.008	0.238	0.233	0.334	0.00503
RP11-337C18.4	-0.012	-0.095	-0.194	-0.387	0.00506
CD38	0.105	0.312	0.223	0.381	0.0052
ATP8B4	-0.019	0.326	0.142	0.27	0.00522
RN7SL1	-0.281	-0.427	-0.266	-0.357	0.00553
TMEM26	-0.068	0.135	0.096	0.334	0.00571
CTA-332P12.2	-0.176	-0.345	-0.03	-0.282	0.00576
PTK7	0.239	0.32	0.253	0.334	0.0067
DCHS1	0.117	0.339	0.185	0.275	0.00685
HIC1	0.184	0.358	0.361	0.315	0.00693
VWA5A	-0.189	-0.306	-0.327	-0.25	0.00698
USP18	0.002	0.227	0.333	0.274	0.0073
MCOLN3	-0.137	-0.363	-0.175	0.026	0.00737
VCAN	0.081	0.388	0.16	0.108	0.00737
AHNAK	0.079	0.335	0.115	0.29	0.00758
MT2A	-0.174	-0.332	-0.312	-0.365	0.00783
PPP1R14C	-0.208	-0.385	-0.338	-0.212	0.00811
RP11-25K21.4	-0.008	0.214	0.212	0.331	0.0087
RN7SL2	-0.288	-0.395	-0.29	-0.285	0.0088
RP11-245J9.2	0.117	0.236	0.02	0.361	0.00898
PCSK6	-0.183	-0.341	-0.329	-0.259	0.00934
RNF213	0.216	0.312	0.188	0.356	0.00962
PYROXD2	0.146	0.324	0.227	0.364	0.0101
NID1	-0.003	0.221	0.197	0.328	0.0108
AP000347.3	0.06	0.272	0.128	0.341	0.0111
MTL1	-0.169	-0.251	-0.359	-0.343	0.0124
TRBD1	0.129	0.383	0.225	0.255	0.0133
RP11-343J24.1	0.051	0.37	0.175	0.204	0.0146
NCRNA00107	0.032	0.344	0.146	0.202	0.0151
RP11-686D22.7	-0.026	0.331	0.137	0.119	0.0152
PSAT1	-0.028	-0.226	-0.172	-0.328	0.0155
SPON1	0.235	0.352	0.144	0.157	0.0165
RP11-448G15.3	0.186	0.315	0.173	0.377	0.0176
TRBJ1-3	0.206	0.349	0.137	0.331	0.0176
TRBJ1-6	0.173	0.383	0.137	0.273	0.0185
LRRK2	0.047	0.337	0.211	0.178	0.0196
CD300LB	0.02	0.34	0.164	0.247	0.0197
NCRNA00118	0.351	0.004	0.067	0.144	0.0199
RP11-574K11.29	0.063	0.023	0.081	0.353	0.0206
TNF	0.346	0.026	0.043	0.008	0.021
VPREB3	0.162	0.263	0.293	0.345	0.0227
RP11-415F23.4	0.216	0.172	0.306	0.346	0.0312
RP11-348M17.1	-0.145	-0.322	-0.157	-0.328	0.0331
EPHA1	0.16	0.129	0.151	0.34	0.035
DAPK2	0.335	0.112	0.167	0.121	0.0438
FSD1	0.331	0.048	0.049	0.114	0.0439
RP11-183C12.1	-0.066	-0.338	-0.218	-0.148	0.044
C11orf45	-0.138	-0.332	-0.273	-0.164	0.0456

## Sheet: 3D Non HA
Gene	l2fc_4hr	l2fc_16hr	l2fc_24hr	l2fc_48hr	LRT_fdr
PFKFB4	0.22	0.73	0.198	0.279	0.000107
LRP1	0.126	0.808	0.37	0.411	0.000765
H1F0	0.191	0.748	0.246	0.406	0.000867
ZC3H8	0.014	-0.419	-0.031	-0.115	0.00139
VSIR	0.064	0.456	0.104	0.185	0.00144
VCAN	0.102	0.825	0.258	0.352	0.00186
MARCH1	0.123	0.629	0.094	0.256	0.00196
C19orf38	0.069	0.534	0.047	0.23	0.00213
FAM13A	-0.001	0.581	0.141	0.131	0.00213
VEGFA	0.221	0.744	0.088	0.183	0.00226
RP11-443B7.1	-0.1	0.595	0.057	0.424	0.0039
RP5-1039K5.12	0.035	-0.472	0.021	-0.147	0.0039
RP11-325E14.3	0.074	0.707	0.148	0.158	0.00407
ANG	0.17	0.702	0.096	0.282	0.0052
CD300A	0.186	0.657	0.186	0.353	0.00743
HK2	0.131	0.688	0.114	0.111	0.00752
P4HA1	-0.148	0.512	0.034	-0.008	0.00752
CR1	0.097	0.548	0.247	0.477	0.009
GPI	-0.032	0.399	-0.051	0.016	0.009
NLRP3	-0.051	0.562	0.172	0.183	0.009
GTF2IRD2	-0.266	-0.535	0.072	-0.362	0.00933
FGGY	-0.205	0.435	0.011	0.048	0.00972
SAP30	-0.071	0.458	-0.068	0.073	0.00972
SNX33	0.046	0.487	0.13	0.19	0.00972
CYP2S1	0.261	0.669	0.06	0.278	0.00986
DPYSL2	0.116	0.513	0.069	0.136	0.00986
SNX29	-0.033	0.36	0.126	0.197	0.00986
TNS1	0.15	0.743	0.334	0.372	0.011
SULF2	0.275	0.751	0.231	0.317	0.012
CPED1	0.009	0.632	0.299	0.376	0.0121
INSR	0.129	0.467	0.014	0.09	0.0126
BNIP3L	-0.056	0.387	0.03	-0.055	0.0126
RAB3D	0.199	0.498	0.177	0.26	0.0126
SYK	0.144	0.59	0.156	0.293	0.0141
RP11-54D18.1	0.109	0.55	0.03	0.164	0.0154
XXbac-BPG248L24.12	0.064	0.669	0.241	0.195	0.0158
ANGPTL4	0.041	0.676	0.356	0.264	0.0162
RP11-25K21.6	0.623	0.621	0.518	0.604	0.0172
CD1D	0.168	0.678	0.25	0.259	0.0177
CNDP2	0.003	0.387	0.081	0.167	0.0192
FHAD1	0.328	0.712	0.301	0.542	0.0192
FOSL2	0.135	0.612	0.251	0.186	0.0192
COLEC12	-0.001	0.633	0.158	0.222	0.0199
TPP1	0.017	0.431	0.088	0.124	0.0213
PDE6G	0.293	0.475	0.064	0.454	0.0253
CTD-2515O10.6	-0.05	0.472	0.163	0.059	0.0259
ST8SIA4	-0.114	0.367	0.122	0.042	0.0259
BACE1	-0.098	0.445	0.141	0.125	0.0265
AGTRAP	0.2	0.499	0.06	0.204	0.0358
DYSF	0.122	0.667	0.211	0.36	0.0358
APOBR	0.098	0.482	0.072	0.107	0.0363
C3	0.277	0.644	0.062	0.304	0.0363
LILRA1	0.328	0.67	0.169	0.332	0.0363
IGLV7-43	-0.274	-0.654	-0.511	-0.265	0.0441
RASGRP4	0.216	0.682	0.268	0.336	0.0441
SIDT2	0.04	0.392	-0.006	0.147	0.0441
MIR210HG	0.056	0.572	0.03	0.022	0.0465
MYCL	0.28	0.636	0.128	0.342	0.0469
GLULP3	0.11	0.617	0.161	0.401	0.0472
NUCB1	0.037	0.393	0.061	0.14	0.0476
AC010518.2	0.018	0.595	0.118	0.266	0.0478
ABCA1	0.079	0.614	0.312	0.25	0.0498
RP11-368N21.2	-0.032	-0.569	0.064	-0.175	0.0498
