# Supplementary material for: Hemophilia A Inhibitor Subjects Show Unique PBMC Gene Expression Profiles That Include Up-Regulated Innate Immune Modulators
Source: Front Immunol. 2020 Jun 12;11:1219. doi: 10.3389/fimmu.2020.01219 (PMC7303277; doi:10.3389/fimmu.2020.01219)
Supplement: Supplementary file 4 [file Table_4.xlsx]

## Sheet: RNAseq
Supplemental Table 4. Reagents, kits and supplies
Cell culture reagents	source	cat#
rFVIII (Recombinate)	Baxter (Westlake Village, CA, USA)	TRH07504AA
1X DPBS (Ca/Mg free)	Gibco Life Technologies (Grand Island, NY, USA)	14190-11
RPMI 1640 with 25 mM HEPES	Gibco Life Technologies	22400-089
Benzonase Nuclease, 10 KU, 250 U/ul	Sigma Aldrich (St. Louis, MO, USA, )	021M0852
human serum AB, sterile filtered	Valley Medical (Winchester, VA, USA)	HS1017
48-well plates, flat bottom	Corning (Corning, NY, USA)	3548
RNeasy Mini Kit	Qiagen (Hilden, Germany)	74104
0.2 micron Nalgene filters	Thermo Fisher Scientific (Waltham, MA, USA)	09-740-63D
Striflip vaccum filter (0.22µm)	Miliporer (Billerica,MA, USA)	SCGP00525
Multifuge X3FR centrifuge	Thermo Fisher Scientific (Waltham, MA, USA)
TC20 automated cell counter	BioRad, Hercules, CA, USA
Microcentrifuge 5415R	Eppendorf Hauppauge, New York, USA
Tween20	Sigma Aldrich (St. Louis, MO, USA, )	P2287-500ml

## Sheet: qRT-PCR
Reagents/Material for RT-PCR	source	cat#
cDNA synthesis kit: SuperScript™ III First-Strand Synthesis SuperMix for qRT-PCR	Invitrogen, USA	11752050
0.2 ml 96 well PCR plate	Thermo scientific, USA	AB-0800
Nuclease- free water	Ambion, USA	AM9938
Lightcycler 480II realtime PCR machine	Roche
RT-qPCR reagents and equipment
96 well White plates compatible with lightcycler 480	Thermo Fisher Scientific (Waltham, MA, USA)	50-720-3203
RNaseZap	Thermo Fisher Scientific (Waltham, MA, USA)	AM9780
TaqMan™ Fast Advanced Master Mix	Thermo Fisher Scientific	4444557
Nano photometer P-300	Implen Inc. Westlake village, CA
RT qPCR primers for Taqman validation of RNASeq results	Thermo Fisher Scientific (Waltham, MA, USA)
Assay ID	Gene	Catalog number:	Target species:	Dye
Hs00918082_m1	NLRP3	4453320	Human	FAM
Hs00152972_m1	TLR8	4453320	Human	FAM
Hs00232390_m1	BATF	4453320	Human	FAM
Hs00375306_m1	PMEPA1	4453320	Human	FAM
Hs00560477_m1	COLEC12	4448892	Human	FAM
Hs00924864_g1	CLEC10A	4448892	Human	FAM
Hs01566408_m1	ZEB1	4448892	Human	FAM
Hs01060665_g1	ACTB	4448489	Human	VIC
Hs00992441_m1	IL32	4448892	Human	FAM
RT qPCR primers for Taqman quantification of IL-32 isoforms
Assay ID	Isoform	Cat number	species	Dye
Hs04353658_gH	IL32-gamma	4448892	Human	FAM
Hs04353656_g1	IL32-beta	4448892	Human	FAM
Hs04353659_gH	IL32-delta	4448892	Human	FAM
Hs04353657_gH	IL32-alpha	4448892	Human	FAM

## Sheet: ELISA
ELISA and Multiplex Cytokine reagents and kits
Product name	Company	Cat#
Human IL-1 beta/IL-1F2 DuoSet ELISA	R&D Systems (Minneapolis, MN, USA)	DY201-05
Human IL-10 DuoSet ELISA	R&D Systems	DY217B-05
Human TNF-alpha DuoSet ELISA	R&D Systems	DY210-05
Human IL-32 DuoSet ELISA	R&D Systems	DY3040-05
DuoSet Ancillary Reagent Kit	R&D Systems	DY008
Invitrogen Cytokine Human Magnetic 25plex panel for Luminex	Thermo Fisher Scientific (Waltham, MA, USA)	LHC0009M
BioPlex 200 luminex system	BioRad, Hercules, CA, USA
BioTEK microtiter plate reader	BioTek Instruments, Inc. VT, USA
Wallac small plate shaker 1296-004	Wallac OY, Turku, Finland
Bioplex magnetic hand washer	BioRad, Hercules, CA, USA	171020100
NUNC MaxiSorp 96-well flat-bottom plates	Thermo Fisher Scientific	439454

## Sheet: ICS
Intra cellular Staining
Product Name	Company Name	Cat#	clone #
Brefeldin A solution (1000x)	Biolegend, San Diego, CA,USA	420601
Human IL32 alpha APC-congujated antibody	R&D Systems, Miniapolis, MN, USA	IC30402A
Rat IgG2A APC isotype control	R&D Systems,Miniapolis, MN, USA	IC006A
life technologies FIX & PERM™ Cell Permeabilization Kit	Thermo Fisher Scientific ( life Technologies, Frederick, MD, USA)	GAS003
Anti Human CD4-PE	Ebioscience, San Diego, CA,USA	12-0049-41	RPA-T4
Anti Human CD14-Fitc	Ebioscience, San Diego, CA ,USA	11-0149-41	61D3
Fixable Viability Dye eFluor™ 450	Ebioscience, San Diego, CA ,USA	65-0863-14
CD4+ T cell isolation kits	Milteny Biotec (Auburn, CA, USA)	130-091-155
CD14+ microbeads kits	Milteny Biotec	130-050-201
5ml polypropylene tube	BD Falcon, Franklin lakes, NJ, USA	352063
LSRII Flowcytometer	BD Bioscience San Jose, CA, USA
